# Supplementary material for: Study on the Antifungal Activity of Gallic Acid and Its Azole Derivatives against Fusarium graminearum
Source: MDPI journal article supplement (doi:10.3390/molecules29091996), 2024-04-26
Supplement: s1 [file s1]

# Study on the Antifungal Activity of Gallic Acid and Its Azole Derivatives against *Fusarium graminearum*

Yilin Zheng <sup>1,2</sup>, Yuqi Geng <sup>1,2</sup>, Wenlong Hou <sup>1,3</sup>, Zhe Li <sup>4</sup>, Caihong Cheng <sup>1,3,\*</sup>, Xiuping Wang <sup>3,4</sup> and Yuedong Yang <sup>1,2</sup>

<sup>1</sup> Hebei Key Laboratory of Active Components and Functions in Natural Products, Hebei Normal University of Science and Technology, Qinhuangdao 066004, China; 17333546871@163.com (Y.Z.); 17531372375@163.com (Y.G.); wenlonghou@126.com (W.H.); kycydyd@126.com (Y.Y.)

<sup>2</sup> College of Chemical Engineering, Hebei Normal University of Science and Technology, Qinhuangdao 066004, China

<sup>3</sup> Analysis and Testing Center, Hebei Normal University of Science and Technology, Qinhuangdao 066004, China; wangxiuping0721@163.com

<sup>4</sup> Hebei Key Laboratory of Crop Stress Biology, College of Agronomy and Biotechnology, Hebei Normal University of Science and Technology, Qinhuangdao 066000, China; zheli2007@163.com

\* Correspondence: cch20059@126.com

The NMR and HR-ESI-MS spectrum of compounds GA, TBMA and AGAs1-3 are as follows:

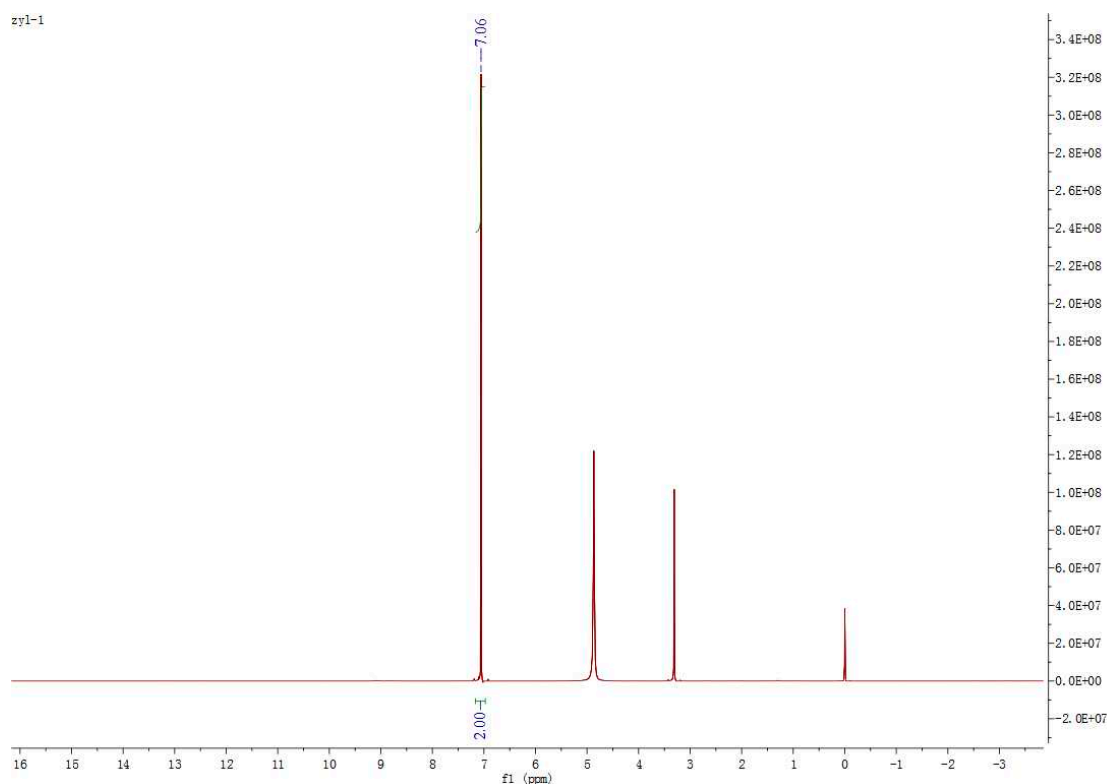

Figure S1. The <sup>1</sup>H NMR spectrum of compound GA

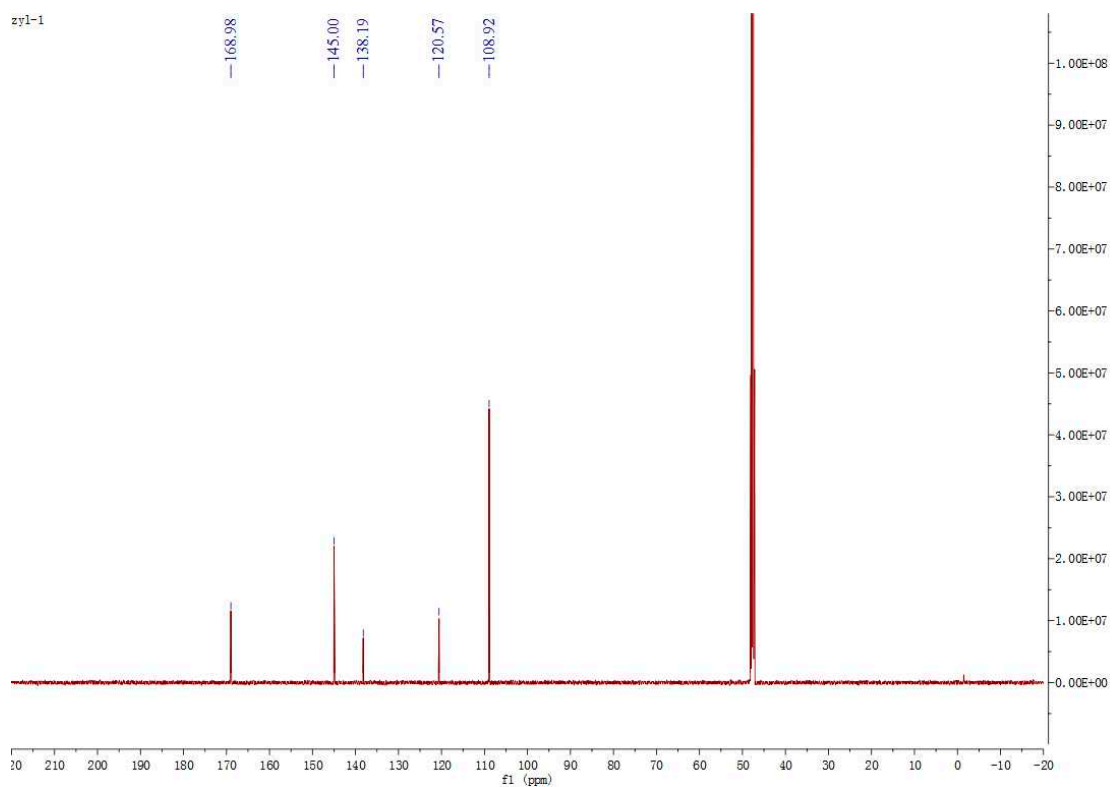

Figure S2. The  $^{13}\text{C}$  NMR spectrum of compound GA

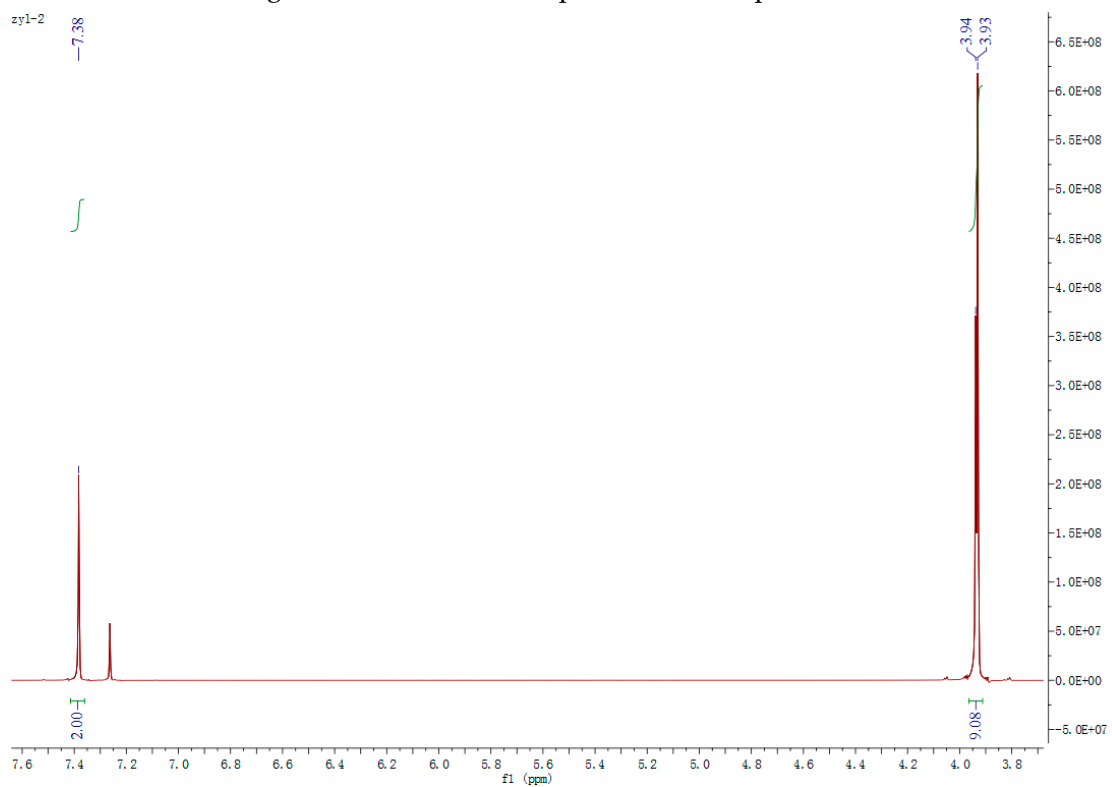

Figure S3. The  $^1\text{H}$  NMR spectrum of compound TMBA

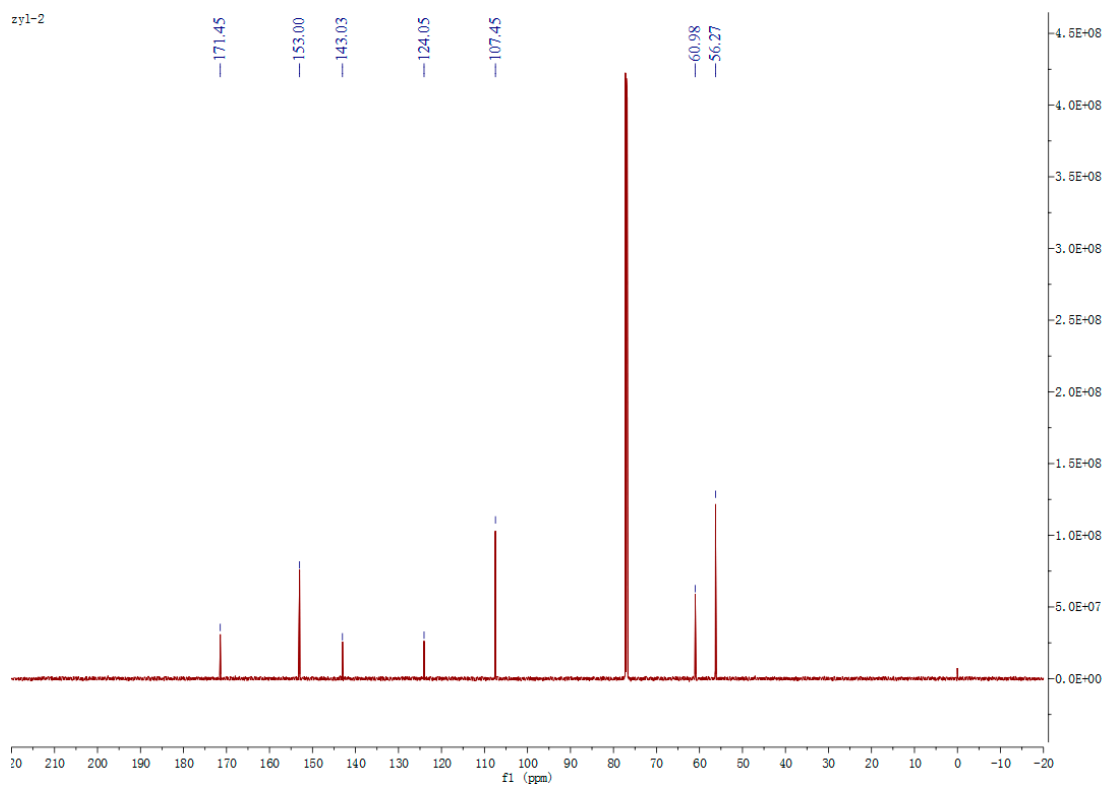

Figure S4. The  $^{13}\text{C}$  NMR spectrum of compound TMBA

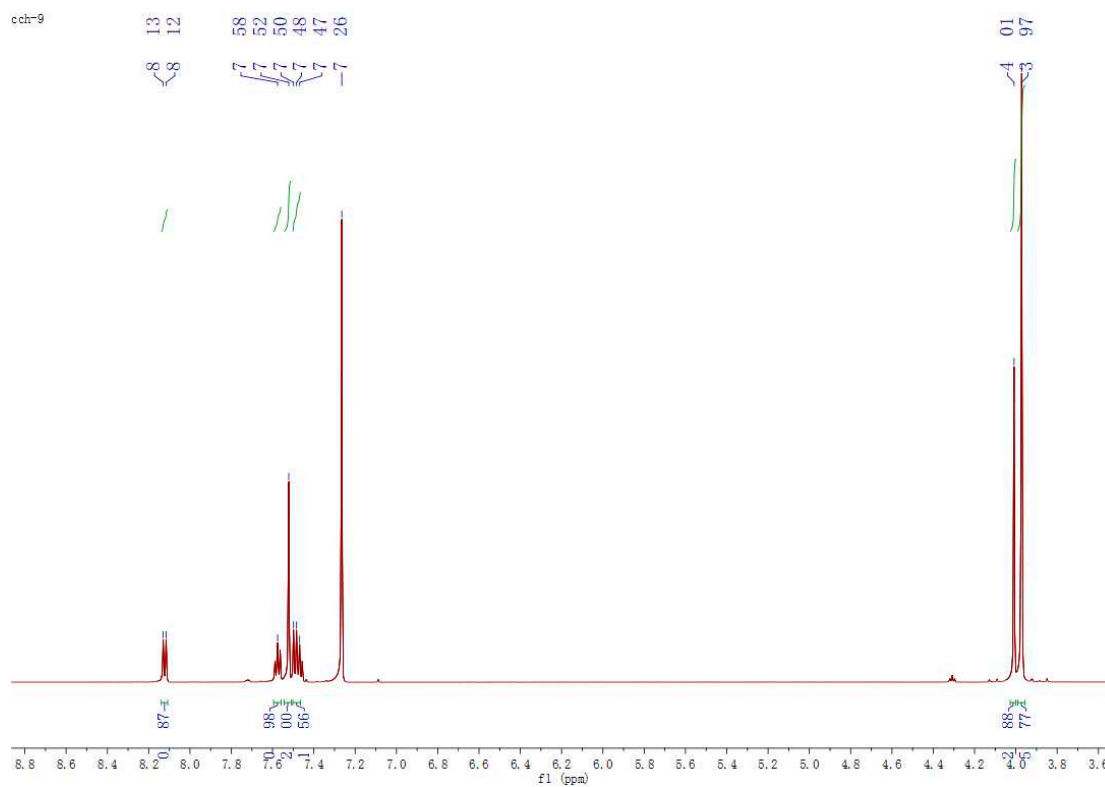

Figure S5. The  $^1\text{H}$  NMR spectrum of compound AGAs-1

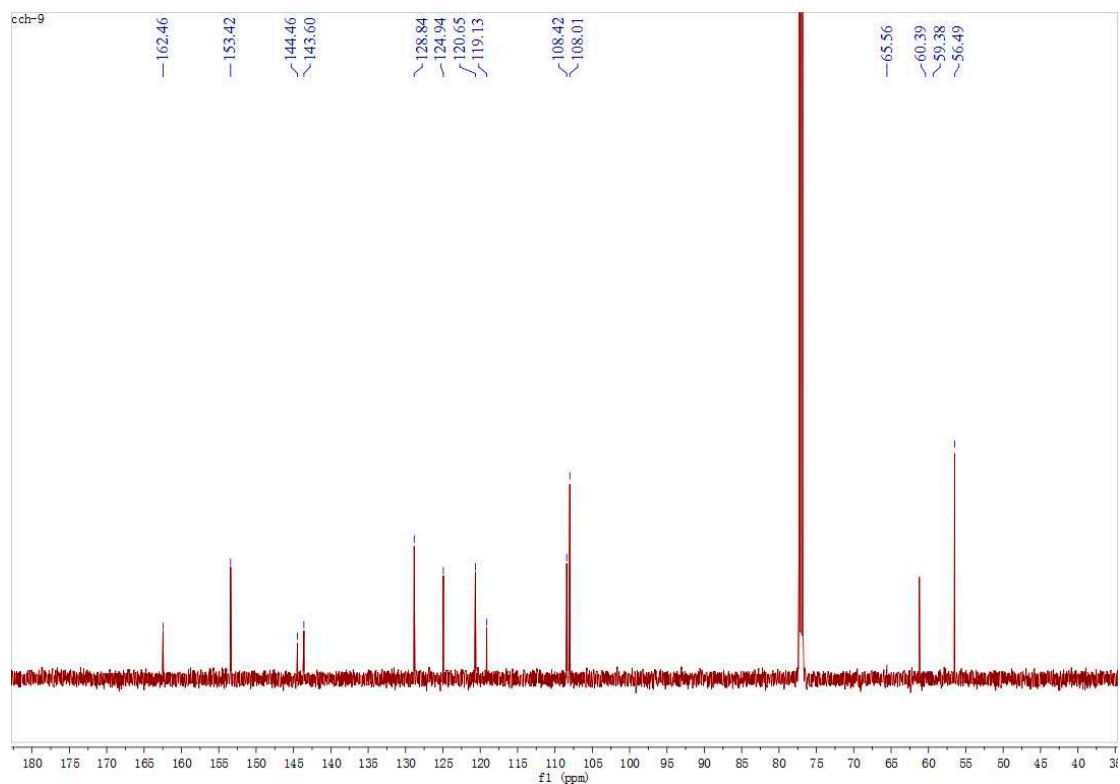

Figure S6. The <sup>13</sup>C NMR spectrum of compound AGAs-1

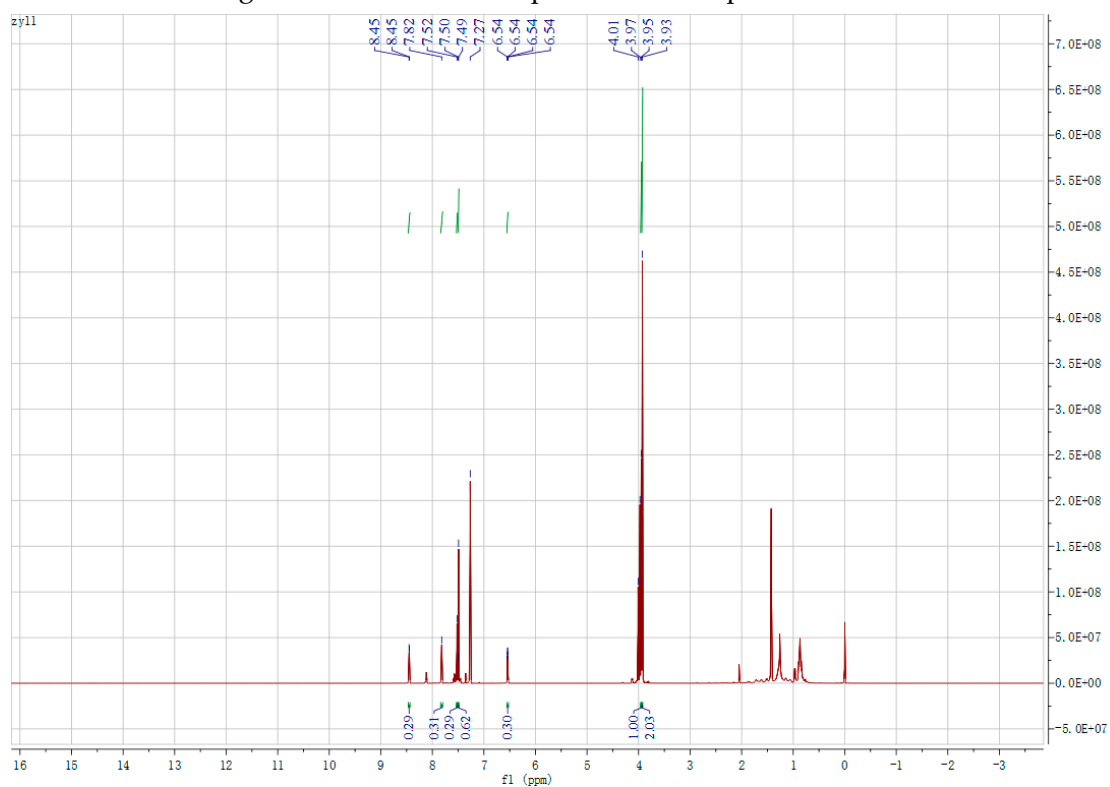

Figure S7. The <sup>1</sup>H NMR spectrum of compound AGAs-2

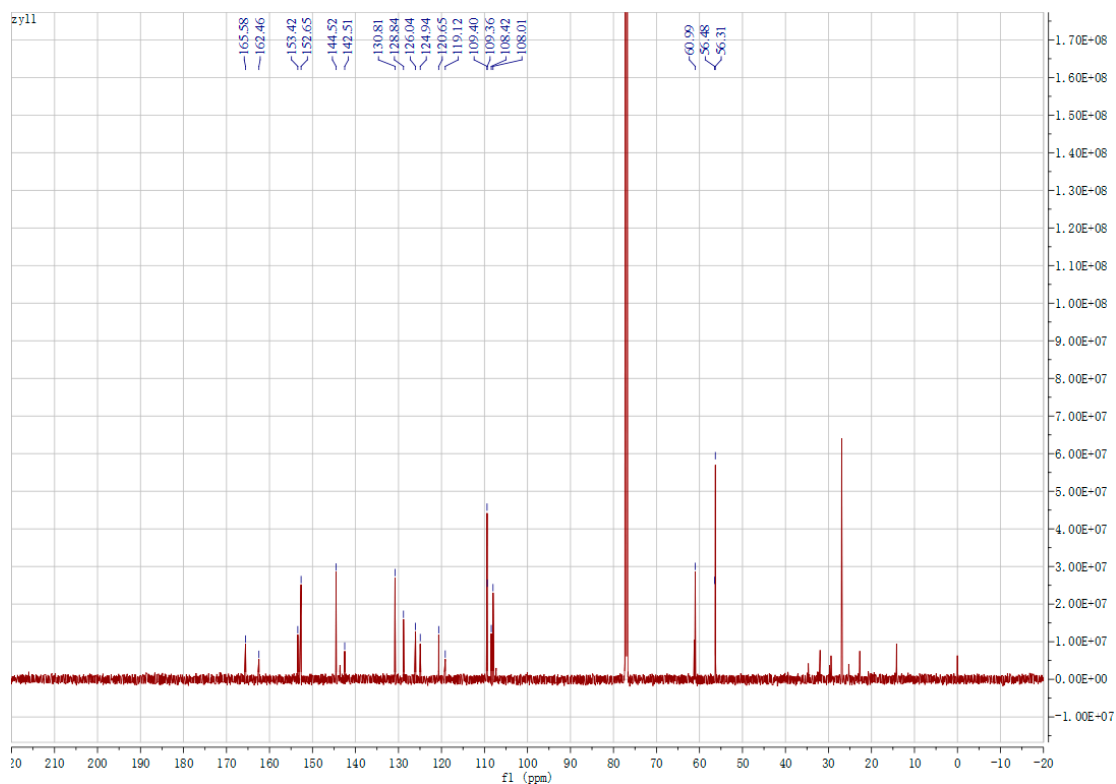

Figure S8. The  $^{13}\text{C}$  NMR spectrum of compound AGAs-2

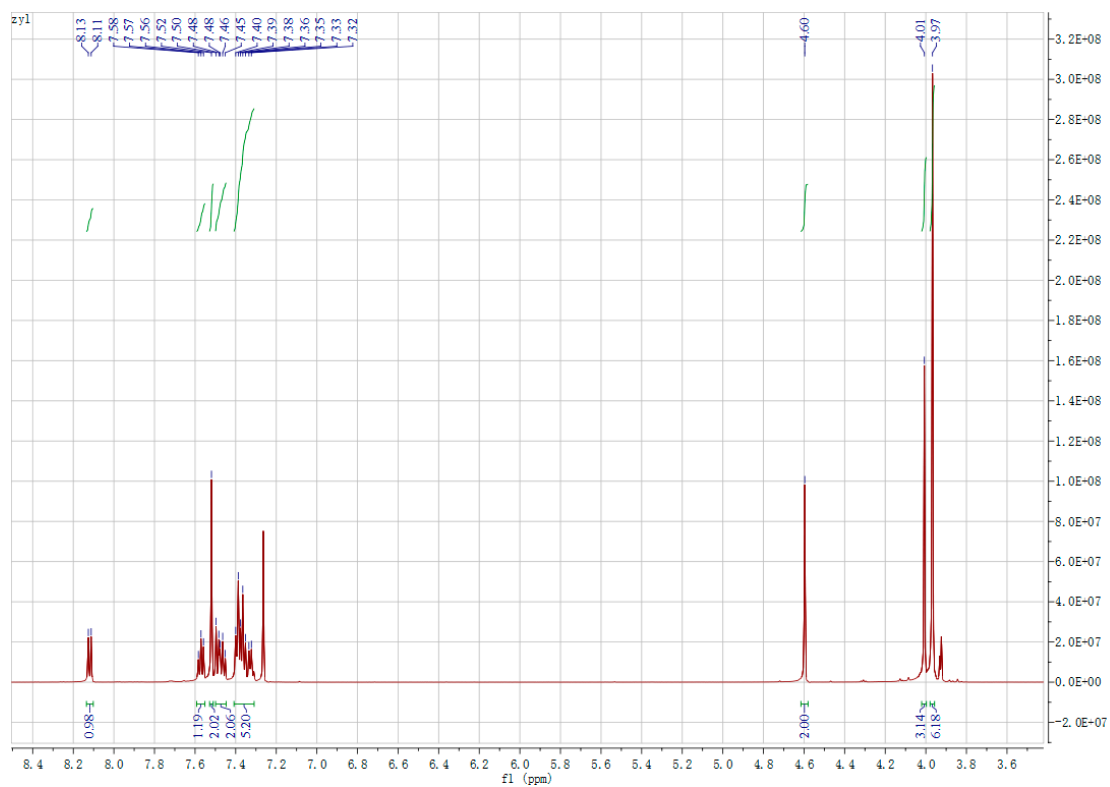

Figure S9. The  $^1\text{H}$  NMR spectrum of compound AGAs-3

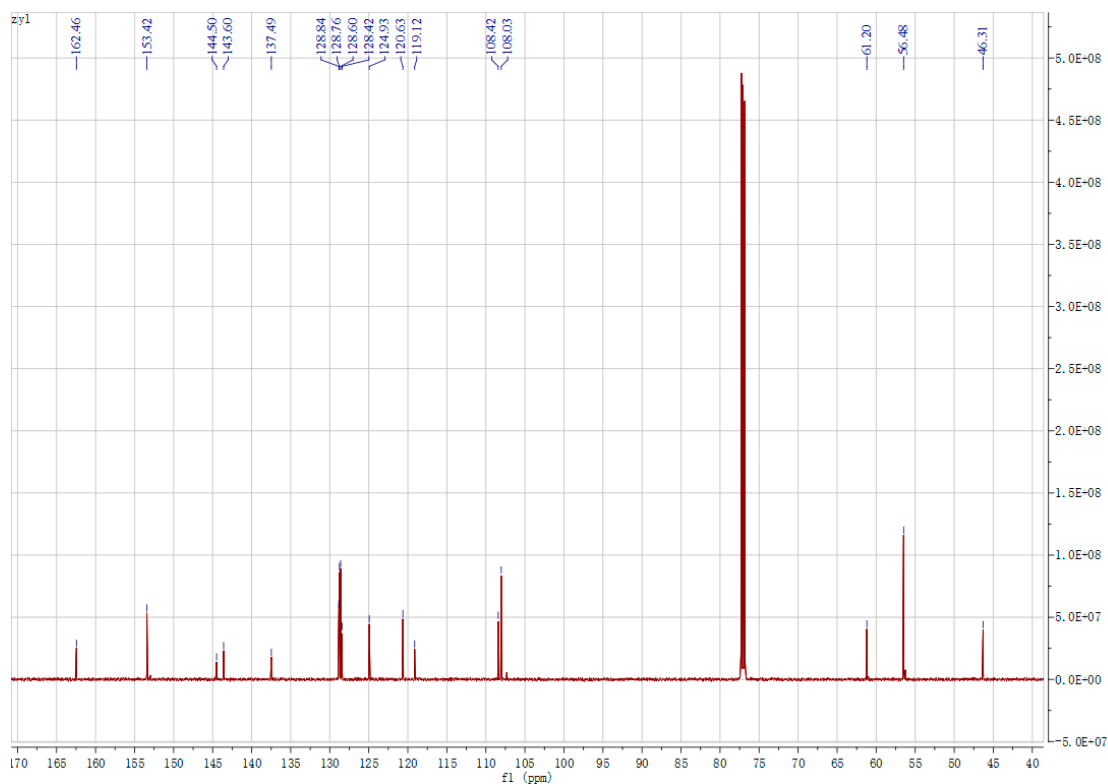

Figure S10. The  $^{13}\text{C}$  NMR spectrum of compound AGAs-3

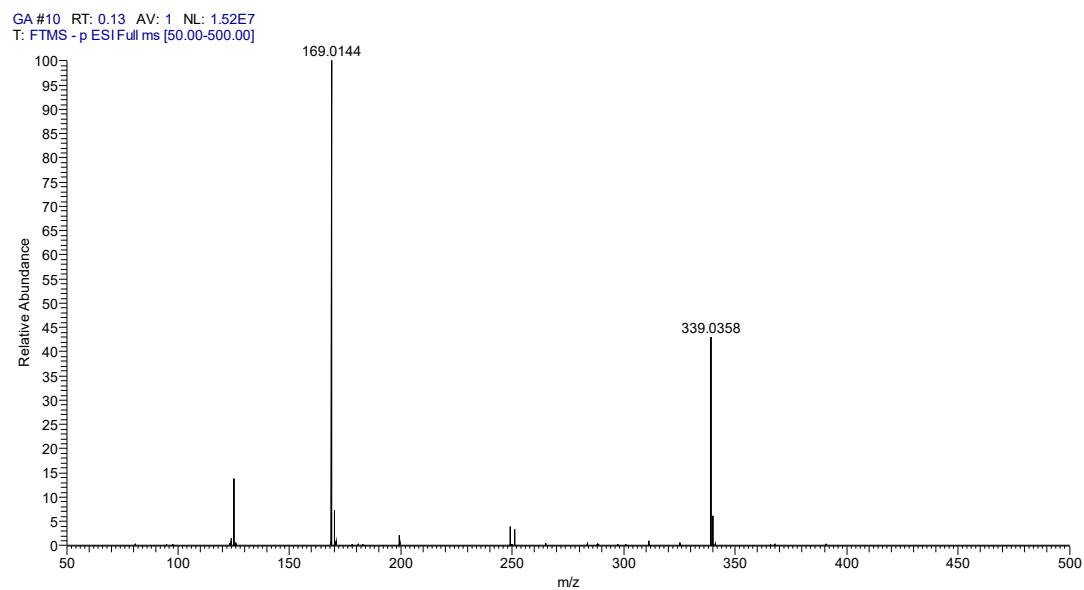

Figure S11. The HR-ESI-MS spectrum of compound GA

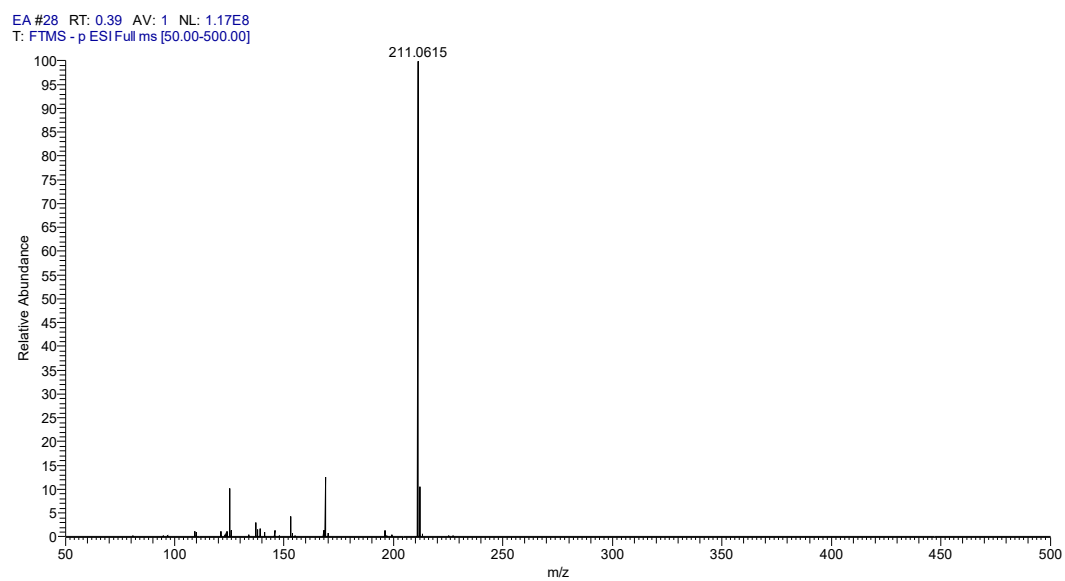

Figure S12. The HR-ESI-MS spectrum of compound TMBA

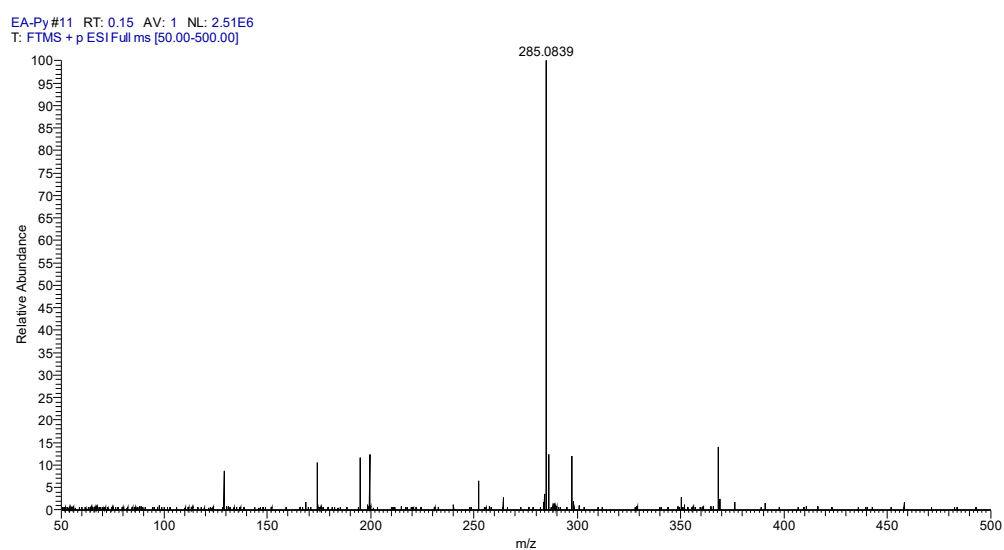

Figure S13. The HR-ESI-MS spectrum of compound AGAs-1

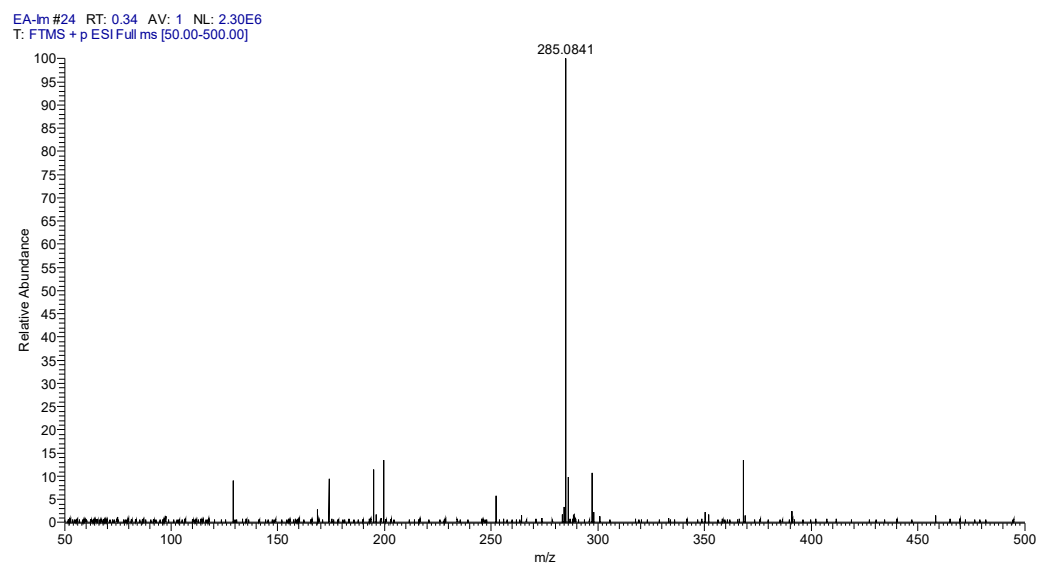

Figure S14. The HR-ESI-MS spectrum of compound AGAs-2

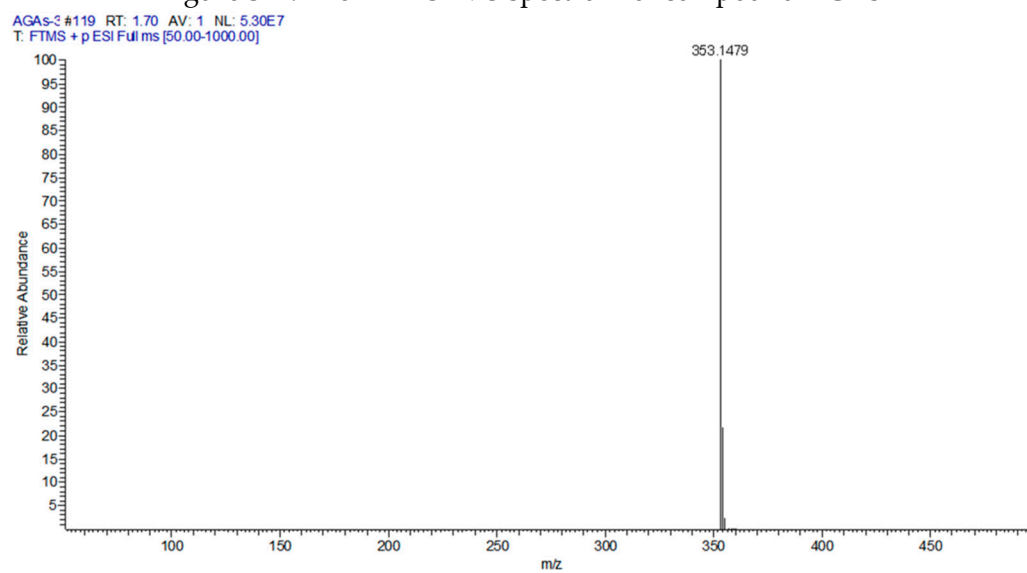

Figure S15. The HR-ESI-MS spectrum of compound AGAs-3
